# Supplementary material for: Blood pressure and burden of hypertension in Cameroon, a microcosm of Africa: a systematic review and meta-analysis of population-based studies
Source: PubMed Central journal article supplement — J Hypertens. 2019 Jun 3;37(11):2190–9. doi: 10.1097/HJH.0000000000002165 (PMC6784854; doi:10.1097/hjh.0000000000002165), 2019-06-03
Supplement: jhype-37-2190-s001.pdf [file jhype-37-2190-s001.pdf]

## Supplementary material

**Supplementary Table 1. Objective measure of the hypertension in the included studies**

| <b>Author,<br/>publication<br/>year</b> | <b>Year of<br/>data<br/>collection</b> | <b>Measurement of the blood pressure as reported in studies</b>                                                                                      |
|-----------------------------------------|----------------------------------------|------------------------------------------------------------------------------------------------------------------------------------------------------|
| Arrey et al.,<br>2016 [41]              | 2013                                   | Two blood pressure (BP) readings were taken using an electronic BP device (OMRON M3 HEM-7200-E, Omron Matsusaka Co. Ltd., Kyoto, Japan).             |
| Cohen et al.,<br>2013 [42]              | 2007                                   | Two BP readings (in mm Hg) were taken using an electronic BP device. The average of the two readings was used.                                       |
| Cooper et al.,<br>1997 [43]             | 1994                                   | BP readings were taken using a standard mercury sphygmomanometer. Three sets of auscultatory readings were taken with 1 minute between each reading. |
| Dzudie et al.,<br>2012 [44]             | 2011                                   | BP readings were taken using an automated electronic BP device (OMRON M3 HEM-7200-E, Omron Matsusaka Co Ltd, Kyoto, Japan).                          |
| Ewane et al.,<br>2011 [45]              | 2009                                   | Diastolic and systolic BP readings were taken using an electronic device (Health Care Co Ltd, Kyoto, Japan).                                         |
| Fezeu et al.,<br>2010 [46]              | 1994                                   | Diastolic and systolic BP readings were recorded three times on the right arm using a standard mercury sphygmomanometer and appropriate cuff sizes.  |
| Fezeu et al.,<br>2010 [46]              | 2003                                   | Diastolic and systolic BP readings were recorded three times on the right arm using a standard mercury sphygmomanometer and appropriate cuff sizes.  |
| Fouda et al.,<br>2012 [47]              | 2010                                   | Diastolic and systolic BP readings were recorded three times using an automated electronic BP device (Spengler TB-101).                              |
| Kamadjeu et<br>al., 2006 [48]           | 2003                                   | Three BP readings were taken using an electronic, fully automatic and clinically validated BP monitor, with a suitable sized cuff at the forearm.    |
| Katte et al.,<br>2014 [49]              | 2012                                   | Three serial BP readings were taken using automated sphygmomanometer (OMRON M2 Basic, OMRON HEALTHCARE Co Ltd, Kyoto, Japan).                        |
| Kaze et al.,<br>2015 [50]               | 2013                                   | BP was measured using an automated sphygmomanometer (OMRON HEM705CP, Omron MatsusakaCo, Matsusaka City, Mie-Ken, Japan).                             |

**Supplementary Table 1. Objective measure of the hypertension in the included studies (continued)**

| <b>Author,<br/>publication<br/>year</b> | <b>Year of<br/>data<br/>collection</b> | <b>Measurement of the blood pressure as reported in studies</b>                                                                                                               |
|-----------------------------------------|----------------------------------------|-------------------------------------------------------------------------------------------------------------------------------------------------------------------------------|
| Kaze et al.,<br>2015 [51]               | 2014                                   | BP was measured using an automated sphygmomanometer (OMRON HEM705CP, Omron MatsusakaCo, Matsusaka City, Mie-Ken, Japan).                                                      |
| Kengne et al.,<br>2007 [52]             | 2004                                   | BP was measured using an automated blood pressure device (OMRON® M4) and appropriate cuff sizes.                                                                              |
| Kingue et al.,<br>2015 [53]             | 2013                                   | BP was measured using a standardized protocol and a validated automated BP device that were regularly calibrated to avoid erroneous measurements.                             |
| Kufe et al.,<br>2015 [54]               | 2007                                   | BP readings were taken three times using an automated calibrated Omron M3 machine. The mean of the 2 <sup>nd</sup> and 3 <sup>rd</sup> reading was considered for this study. |
| Kufe et al.,<br>2016 [55]               | 2013                                   | BP readings were taken using an automated calibrated Omron M3 machine. Mean blood pressure of two closest measures was obtained.                                              |
| Lemogoum et<br>al, 2018 [56]            | 2014-2015                              | Three consecutive BP measurements were taken using a validated automated sphygmomanometer (HEM-705 CP, Omron Corporation, Tokyo, Japan).                                      |
| Lemogoum et<br>al., 2018 [57]           | 2013-2014                              | Three consecutive BP measurements were taken using a validated automated sphygmomanometer (HEM-705 CP, Omron Corporation, Tokyo, Japan).                                      |
| Mbouemboue<br>et al., 2016 [58]         | 2014                                   | BP was measured using a manual mercury sphygmomanometer (ADC ProspHYG model 770).                                                                                             |
| Nkondjock et<br>al., 2010 [59]          | 2008                                   | Two consecutive diastolic and systolic BP readings were taken using an electronic BP device (OMRON HEM-712-C, Japan).                                                         |

**Supplementary Table 2. Characteristics of included studies**

| Author,<br>publication<br>year | Year of<br>data<br>collection | Sample<br>size | Area of<br>residence | Agroecological<br>zone                                         | Subnational<br>region of<br>Cameroon       | Community: City<br>(neighbourhood)<br>or village | Total<br>quality<br>score |
|--------------------------------|-------------------------------|----------------|----------------------|----------------------------------------------------------------|--------------------------------------------|--------------------------------------------------|---------------------------|
| Arrey et al.,<br>2016 [41]     | 2013                          | 733            | Rural                | Humid                                                          | South West                                 | Moliwe Health<br>Area                            | 15                        |
| Cohen et al.,<br>2013 [42]     | 2007                          | 181            | Urban                | Sub-humid                                                      | Centre                                     | Yaoundé                                          | 13                        |
| Cooper et al.,<br>1997 [43]    | 1994                          | 2828           | Rural and<br>Urban   | Sub-humid                                                      | Centre                                     | Yaoundé, rural<br>settings                       | 11                        |
| Dzudie et al.,<br>2012 [44]    | 2011                          | 2120           | Urban                | Sub-humid;<br>Humid; Tropical<br>highlands                     | Centre,<br>Littoral, North-<br>West, West  | Yaoundé, Douala,<br>Bamenda,<br>Bafoussam        | 13                        |
| Ewane et al.,<br>2011 [45]     | 2009                          | 270            | Urban                | Humid                                                          | Littoral                                   | Douala                                           | 8                         |
| Fezeu et al.,<br>2010 [46]     | 1994                          | 1762           | Rural and<br>Urban   | Sub-humid                                                      | Centre                                     | Yaoundé (Cité<br>Verte), Evodoula                | 12                        |
| Fezeu et al.,<br>2010 [46]     | 2003                          | 1398           | Rural and<br>Urban   | Sub-humid                                                      | Centre                                     | Yaoundé (Cité<br>Verte), Evodoula                | 12                        |
| Fouda et al.,<br>2012 [47]     | 2010                          | 552            | Urban                | Humid                                                          | Littoral                                   | Douala                                           | 13                        |
| Kamadjeu et<br>al., 2006 [48]  | 2003                          | 10011          | Urban                | Sub-humid;<br>Humid; Tropical<br>highlands;<br>Sudano-sahelian | Centre,<br>Littoral, North-<br>West, North | Yaoundé, Douala,<br>Garoua, Bamenda              | 13                        |
| Katte et al.,<br>2014 [49]     | 2012                          | 1702           | Urban                | Tropical highlands                                             | West                                       | Bafoussam                                        | 13                        |
| Kaze et al.,<br>2015 [50]      | 2013                          | 500            | Urban                | Humid                                                          | Littoral                                   | Douala (Cité des<br>Palmiers)                    | 12                        |
| Kaze et al.,<br>2015 [51]      | 2014                          | 439            | Urban                | Tropical highlands                                             | West                                       | Dschang Health<br>District                       | 16                        |

**Supplementary Table 2. Characteristics of included studies (continued)**

| Author,<br>publication<br>year     | Year of<br>data<br>collection | Sample<br>size | Area of<br>residence | Agroecological<br>zone                                                             | Subnational<br>region of<br>Cameroon | Community: City<br>(neighbourhood)<br>or village                 | Total<br>quality<br>score |
|------------------------------------|-------------------------------|----------------|----------------------|------------------------------------------------------------------------------------|--------------------------------------|------------------------------------------------------------------|---------------------------|
| Kengne et al.,<br>2007 [52]        | 2004                          | 2559           | Urban                | Humid                                                                              | Littoral                             | Douala (Cité des<br>Palmiers)                                    | 10                        |
| Kingue et al.,<br>2015 [53]        | 2013                          | 15470          | Urban                | Sub-humid;<br>Humid; Tropical<br>highlands; Guinea<br>savanna; Sudano-<br>sahelian | National                             | Urban sites in all 10<br>regions                                 | 16                        |
| Kufe et al.,<br>2015 [54]          | 2007                          | 1623           | Urban                | Sub-humid                                                                          | Centre                               | Yaoundé<br>(Biyemassi)                                           | 15                        |
| Kufe et al.,<br>2016 [55]          | 2013                          | 1921           | Rural                | Sub-humid;<br>Sudano-sahelian                                                      | East, Adamawa                        | Mandjou II, Guiwa<br>Yangmou, Gom-<br>Mana, Mazidou,<br>Sabga    | 15                        |
| Lemougoum et<br>al., 2018 [56]     | 2014-2015                     | 889            | Rural and<br>urban   | Sudano-sahelian                                                                    | Far North                            | Health District of<br>Maroua 1 and<br>Tokombere                  | 17                        |
| Lemougoum et<br>al., 2018 [57]     | 2013-2014                     | 300            | Rural and<br>urban   | Sub-humid;<br>Humid                                                                | Littoral and<br>South                | Douala (Cité des<br>Palmiers) and<br>Lolodorf Health<br>District | 18                        |
| Mbouemboue<br>et al., 2016<br>[58] | 2014                          | 700            | Urban                | Guinea savanna                                                                     | Adamawa                              | Ngaoundere                                                       | 9                         |
| Nkondjock et<br>al., 2010 [59]     | 2008                          | 533            | Urban                | Sub-humid                                                                          | Centre                               | Yaoundé                                                          | 10                        |

**Supplementary Table 3. Number of data points (N) and original pooled sample (S) generated from raw data in primary studies and utilized for computing overall and subgroup statistics using random-effects meta-analysis**

| Distribution of separately pooled samples with raw data from included studies | Overall<br>N (S) | Mean blood pressure<br>N (S) | Crude hypertension<br>Prevalence<br>N (S) | Age-standardized hypertension<br>Prevalence<br>N (S) | Prevalence of hypertension<br>awareness<br>N (S) | Prevalence of hypertension<br>treatment<br>N (S) | Prevalence of hypertension<br>control<br>N (S) |
|-------------------------------------------------------------------------------|------------------|------------------------------|-------------------------------------------|------------------------------------------------------|--------------------------------------------------|--------------------------------------------------|------------------------------------------------|
| <b>All studies</b>                                                            | 20 (46491)       | 13 (29780)                   | 20 (46491)                                | 11 (37798)                                           | 9 (34524)                                        | 6 (17078)                                        | 4 (6178)                                       |
| <b>Period of data collection</b>                                              |                  |                              |                                           |                                                      |                                                  |                                                  |                                                |
| 1994-2010                                                                     | 10 (21717)       | 5 (6439)                     | 10 (21717)                                | 5 (14996)                                            | 3 (13171)                                        | 2 (11634)                                        | 1 (1623)                                       |
| 2011-2018                                                                     | 10 (24774)       | 8 (23341)                    | 10 (24774)                                | 6 (22802)                                            | 6 (21353)                                        | 4 (5444)                                         | 3 (4555)                                       |
| <b>Total quality score</b>                                                    |                  |                              |                                           |                                                      |                                                  |                                                  |                                                |
| < 15                                                                          | 13 (25116)       | 8 (10761)                    | 13 (25116)                                | 7 (17895)                                            | 5 (16993)                                        | 3 (13833)                                        | 2 (3822)                                       |
| 15-19                                                                         | 7 (21375)        | 5 (19019)                    | 7 (21375)                                 | 4 (19903)                                            | 4 (17531)                                        | 3 (3245)                                         | 2 (2356)                                       |
| <b>Sample size</b>                                                            |                  |                              |                                           |                                                      |                                                  |                                                  |                                                |
| < 800                                                                         | 9 (4208)         | 5 (1690)                     | 9 (4208)                                  | 3 (1503)                                             | 2 (1172)                                         | 1 (733)                                          | 1 (733)                                        |
| 800 – 1999                                                                    | 6 (9295)         | 5 (7672)                     | 6 (9295)                                  | 4 (6135)                                             | 4 (5751)                                         | 3 (4214)                                         | 2 (3325)                                       |
| ≥ 2000                                                                        | 5 (32988)        | 3 (20418)                    | 5 (32988)                                 | 4 (30160)                                            | 3 (27601)                                        | 2 (12131)                                        | 1 (2120)                                       |
| <b>Sex</b>                                                                    |                  |                              |                                           |                                                      |                                                  |                                                  |                                                |
| Male                                                                          | 20 (21829)       | 13 (14595)                   | 20 (21829)                                | 9 (9213)                                             | 9 (16267)                                        | 6 (7379)                                         | 4 (2852)                                       |
| Female                                                                        | 20 (24662)       | 13 (15185)                   | 20 (24662)                                | 9 (12582)                                            | 9 (18257)                                        | 6 (9699)                                         | 4 (3326)                                       |
| <b>Age group (in years)</b>                                                   |                  |                              |                                           |                                                      |                                                  |                                                  |                                                |
| < 35                                                                          | 2 (1027)         | 0                            | 2 (1027)                                  | 0                                                    | 2 (1027)                                         | 2 (1027)                                         | 2 (1027)                                       |
| 35-44                                                                         | 2 (905)          | 0                            | 2 (905)                                   | 0                                                    | 2 (905)                                          | 2 (905)                                          | 2 (905)                                        |
| 45-54                                                                         | 2 (974)          | 0                            | 2 (974)                                   | 0                                                    | 2 (974)                                          | 2 (974)                                          | 2 (974)                                        |
| ≥ 55                                                                          | 2 (916)          | 0                            | 2 (916)                                   | 0                                                    | 2 (916)                                          | 2 (916)                                          | 2 (916)                                        |
| <b>Ethnic origin</b>                                                          |                  |                              |                                           |                                                      |                                                  |                                                  |                                                |
| Bamileke                                                                      | 1 (181)          | 1 (181)                      | 1 (181)                                   | 0                                                    | 0                                                | 0                                                | 0                                              |
| Bantu                                                                         | 1 (150)          | 1 (150)                      | 1 (150)                                   | 0                                                    | 0                                                | 0                                                | 0                                              |
| Fulbe                                                                         | 2 (1308)         | 2 (1308)                     | 2 (1308)                                  | 2 (1308)                                             | 1 (889)                                          | 1 (889)                                          | 0                                              |
| Mbororo                                                                       | 1 (918)          | 1 (918)                      | 1 (918)                                   | 1 (918)                                              | 0                                                | 0                                                | 0                                              |

**Supplementary Table 3. Number of data points (N) and original pooled sample (S) generated from raw data in primary studies and utilized for computing overall and subgroup statistics using random-effects meta-analysis (continued)**

| Distribution of separately pooled samples with raw data from included studies | Overall N (S) | Mean BP N (S) | Crude hypertension Prevalence N (S) | Age-standardized hypertension Prevalence N (S) | Prevalence of hypertension awareness N (S) | Prevalence of hypertension treatment N (S) | Prevalence of hypertension control N (S) |
|-------------------------------------------------------------------------------|---------------|---------------|-------------------------------------|------------------------------------------------|--------------------------------------------|--------------------------------------------|------------------------------------------|
| <b>Ethnic origin</b>                                                          |               |               |                                     |                                                |                                            |                                            |                                          |
| <b>(continued)</b>                                                            |               |               |                                     |                                                |                                            |                                            |                                          |
| Pygmy                                                                         | 1 (150)       | 1 (150)       | 1 (150)                             | 0                                              | 0                                          | 0                                          | 0                                        |
| Mixed                                                                         | 17 (43784)    | 17 (43784)    | 17 (43784)                          | 10 (35572)                                     | 8 (33635)                                  | 5 (16189)                                  | 4 (6178)                                 |
| <b>Area of residence</b>                                                      |               |               |                                     |                                                |                                            |                                            |                                          |
| Rural                                                                         | 7 (6151)      | 7 (5418)      | 7 (6151)                            | 2 (2349)                                       | 5 (2613)                                   | 2 (1161)                                   | 1 (733)                                  |
| Urban                                                                         | 18 (40340)    | 18 (24362)    | 18 (40340)                          | 10 (35449)                                     | 8 (31911)                                  | 5 (15917)                                  | 3 (5445)                                 |
| <b>Agroecological zone</b>                                                    |               |               |                                     |                                                |                                            |                                            |                                          |
| Guinea savannah                                                               | 3 (2077)      | 2 (1377)      | 3 (2077)                            | 2 (1411)                                       | 1 (666)                                    | 0                                          | 0                                        |
| Humid                                                                         | 9 (12075)     | 5 (5728)      | 9 (12075)                           | 3 (3996)                                       | 4 (8044)                                   | 3 (4403)                                   | 2 (1900)                                 |
| Sub-humid                                                                     | 11 (20487)    | 8 (15828)     | 11 (20487)                          | 4 (4015)                                       | 5 (13962)                                  | 3 (4775)                                   | 2 (2272)                                 |
| Sudano-sahelian                                                               | 3 (4724)      | 2 (2221)      | 3 (4724)                            | 1 (889)                                        | 3 (4724)                                   | 2 (3392)                                   | 0                                        |
| Tropical highlands                                                            | 5 (7128)      | 4 (4626)      | 5 (7128)                            | 2 (2006)                                       | 5 (7128)                                   | 3 (4508)                                   | 2 (2006)                                 |
| <b>Subnational region</b>                                                     |               |               |                                     |                                                |                                            |                                            |                                          |
| Adamawa                                                                       | 3 (2077)      | 2 (1377)      | 3 (2077)                            | 2 (1411)                                       | 1 (666)                                    | 0                                          | 0                                        |
| Centre                                                                        | 9 (14027)     | 6 (9368)      | 9 (14027)                           | 3 (2805)                                       | 4 (6312)                                   | 3 (4775)                                   | 2 (2272)                                 |
| East                                                                          | 2 (3760)      | 2 (3760)      | 2 (3760)                            | 1 (1210)                                       | 0                                          | 0                                          | 0                                        |
| Far North                                                                     | 2 (1555)      | 2 (1555)      | 2 (1555)                            | 1 (889)                                        | 1 (889)                                    | 1 (889)                                    | 0                                        |
| Littoral                                                                      | 8 (10251)     | 5 (4637)      | 8 (10251)                           | 3 (3996)                                       | 2 (3670)                                   | 2 (3670)                                   | 1 (1167)                                 |
| North                                                                         | 2 (3169)      | 1 (666)       | 2 (3169)                            | 0                                              | 1 (2503)                                   | 1 (2503)                                   | 0                                        |
| North-West                                                                    | 3 (3744)      | 2 (1242)      | 3 (3744)                            | 0                                              | 1(2502)                                    | 1 (2502)                                   | 0                                        |
| South                                                                         | 2 (2700)      | 2 (2700)      | 2 (2700)                            | 0                                              | 0                                          | 0                                          | 0                                        |
| South-West                                                                    | 2 (1824)      | 1 (1091)      | 2 (1824)                            | 0                                              | 1 (733)                                    | 1 (733)                                    | 1 (733)                                  |
| West                                                                          | 4 (3384)      | 4 (3384)      | 4 (3384)                            | 1 (1702)                                       | 2 (2141)                                   | 1 (1702)                                   | 1 (1702)                                 |

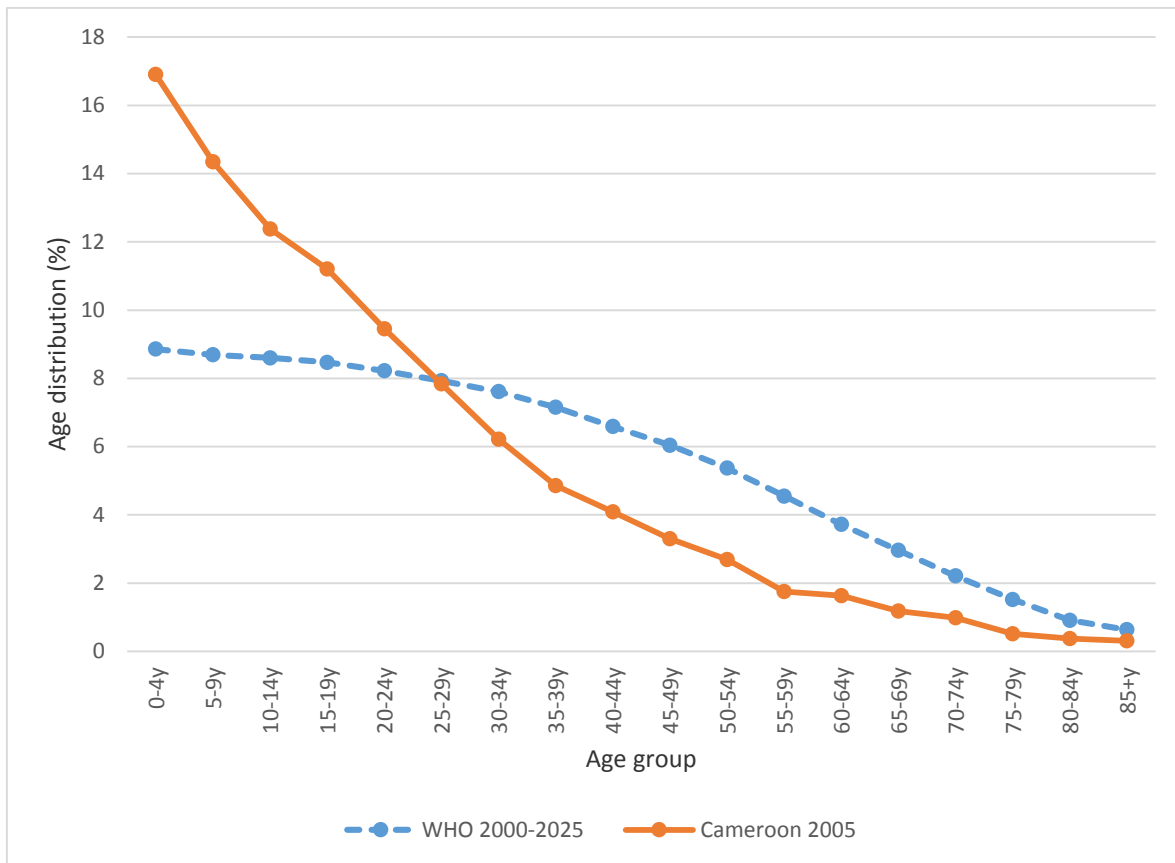

**Supplementary Figure 1. Comparison of the WHO World Standard Population Distribution (%) (based on world average population between 2000-2025) and the Cameroon Population Distribution (%) (based on the 2005 Census).**



### a. Mean systolic blood pressure

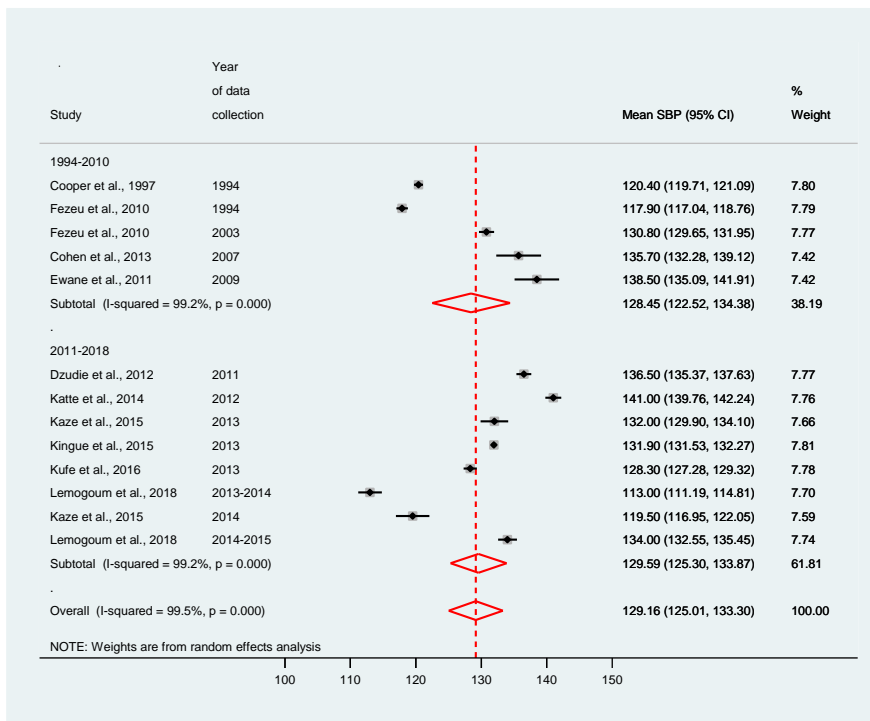

### b. Mean diastolic blood pressure

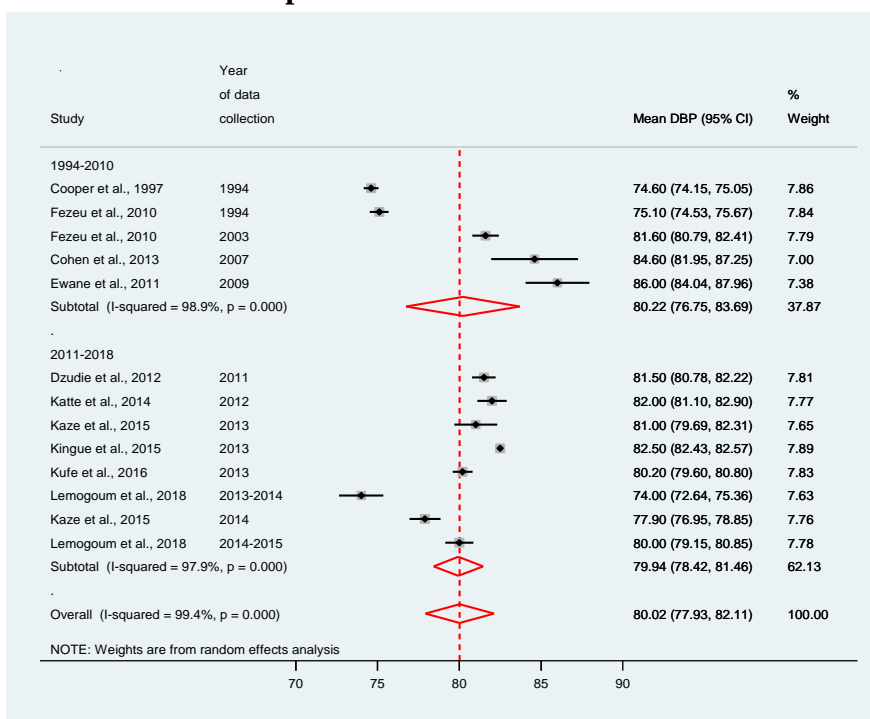

**Supplementary Figure 2. Forest plots of the mean systolic blood pressure and the mean diastolic blood pressure in Cameroon by period of data collection.**

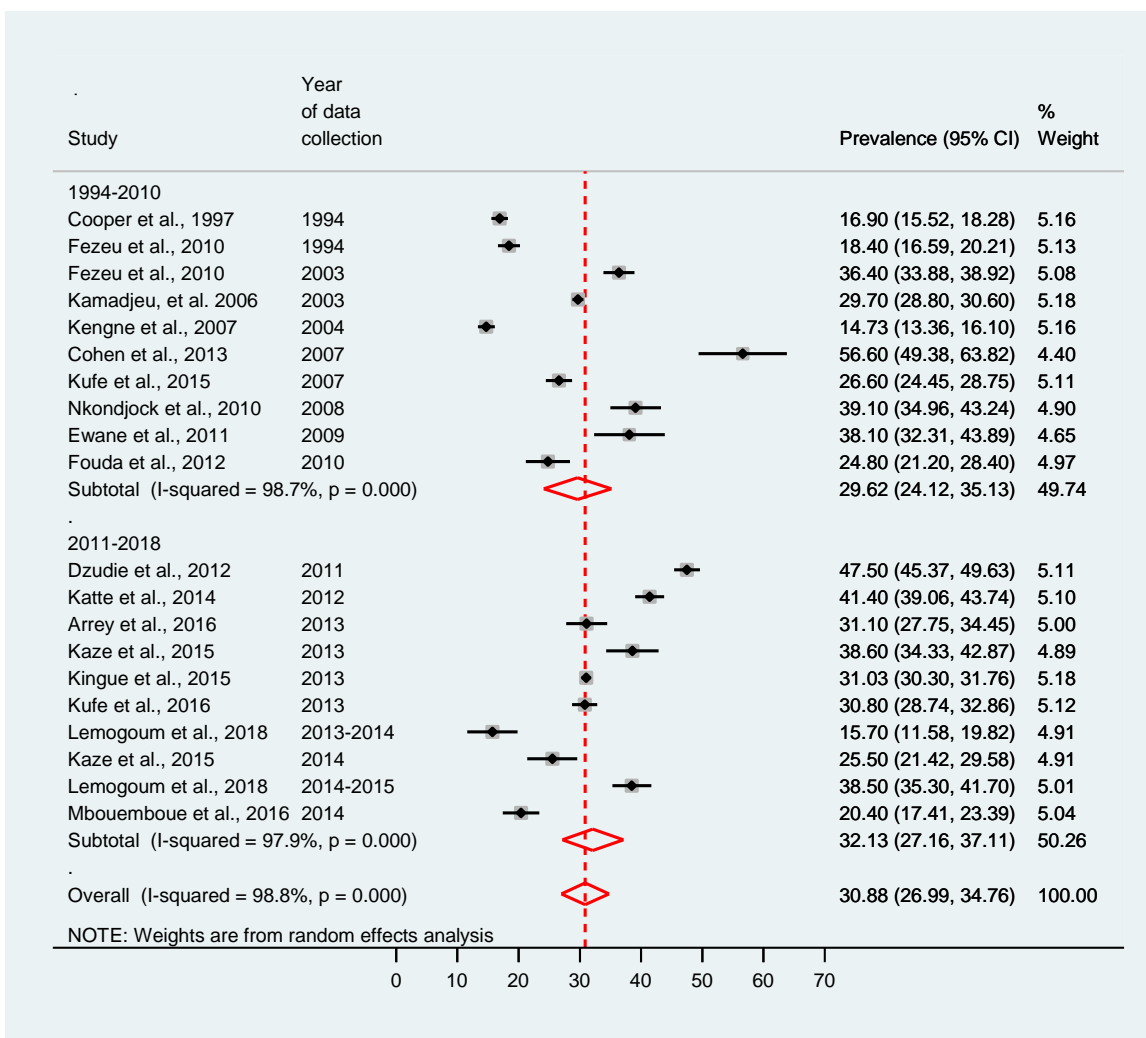

**Supplementary Figure 3. Forest plot of the crude hypertension prevalence in Cameroon by period of data collection.**

### a. Crude hypertension prevalence

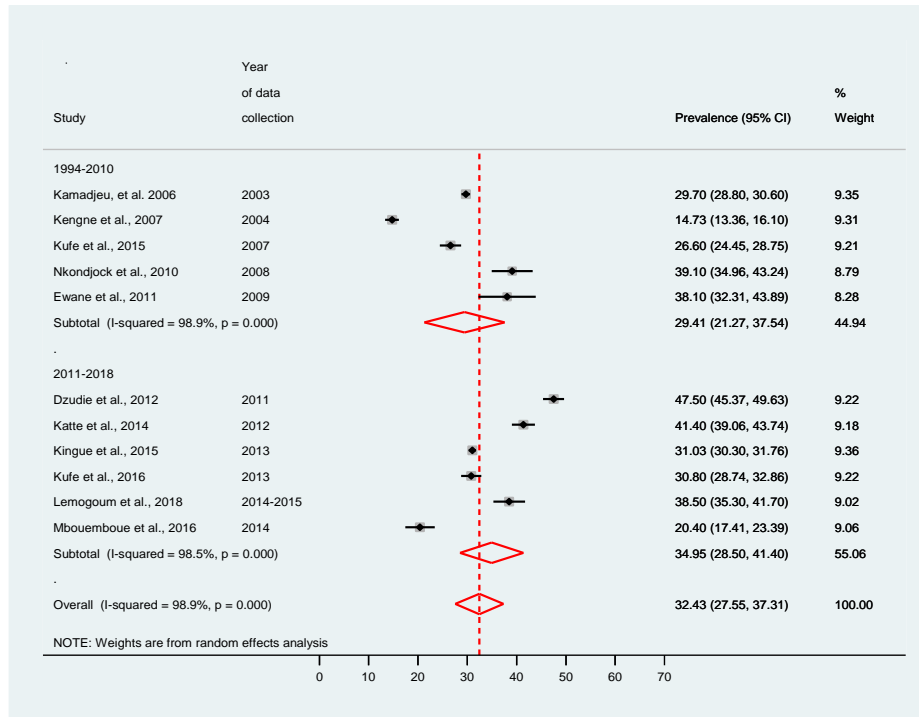

### b. Age-standardized hypertension prevalence

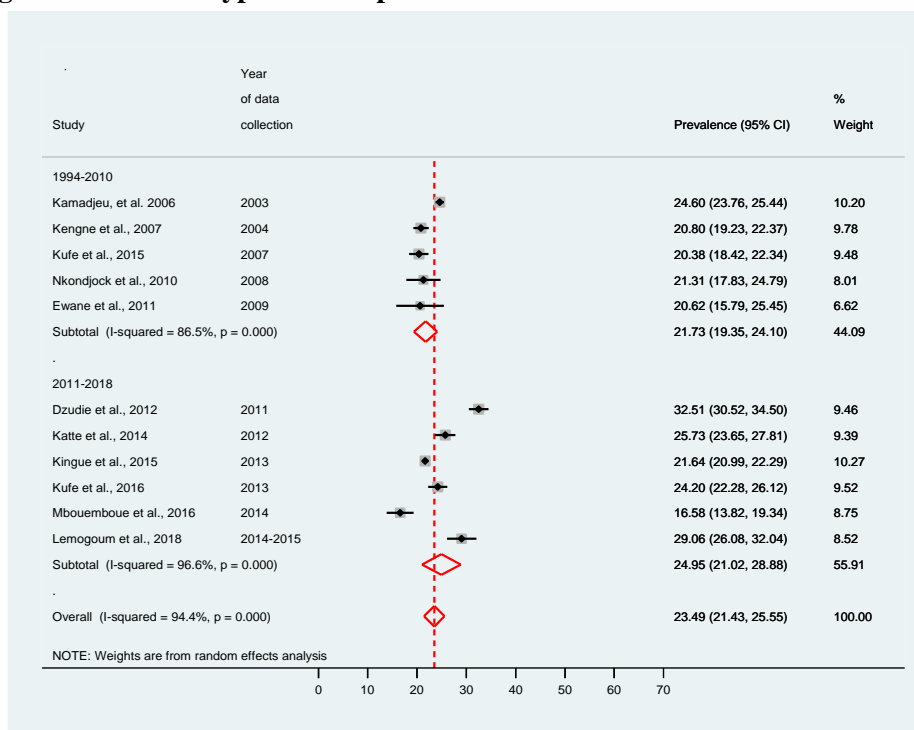

**Supplementary Figure 4. Forest plots of crude and age-standardized hypertension prevalence in Cameroon by period of data collection**

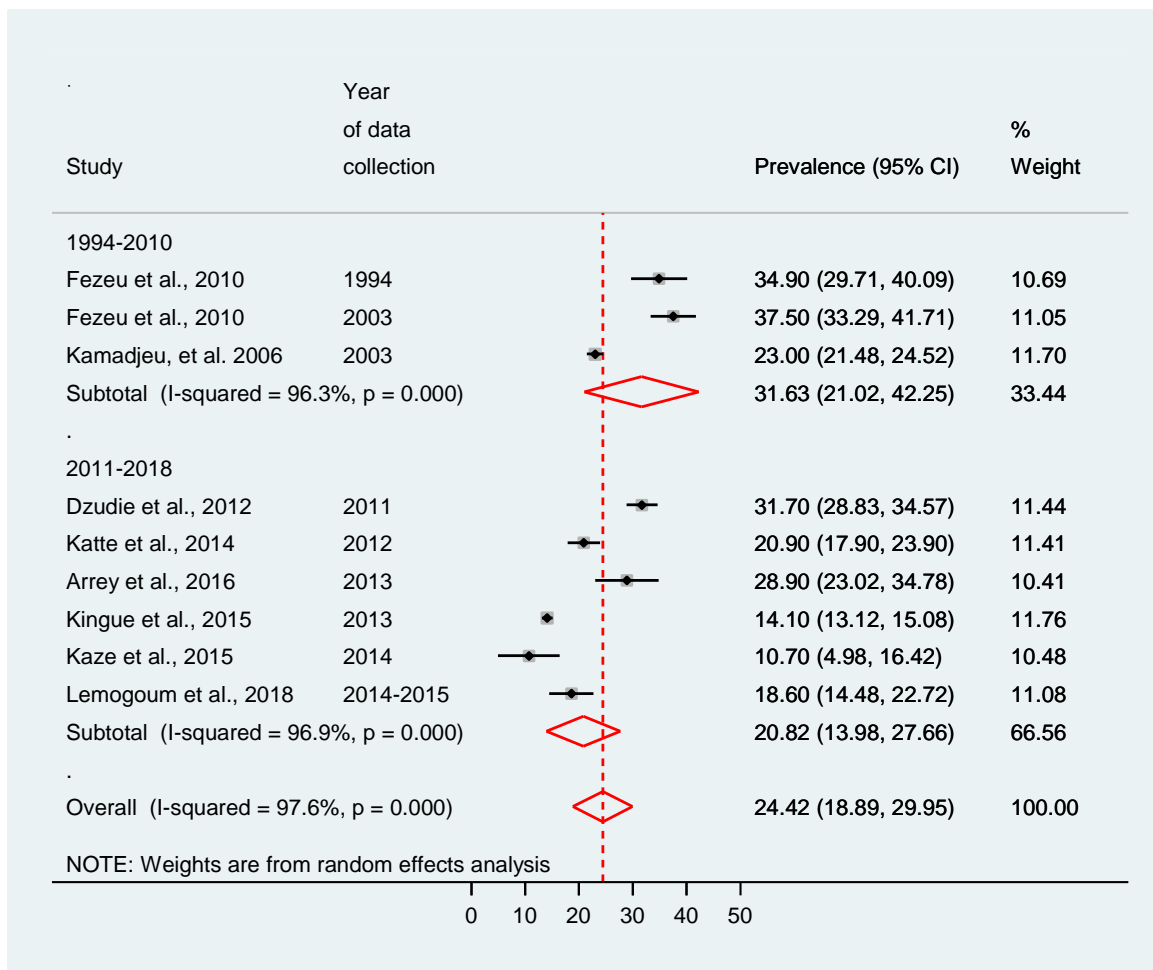

**Supplementary Figure 5. Forest plot of the prevalence of awareness of hypertension in Cameroon by period of data collection.**

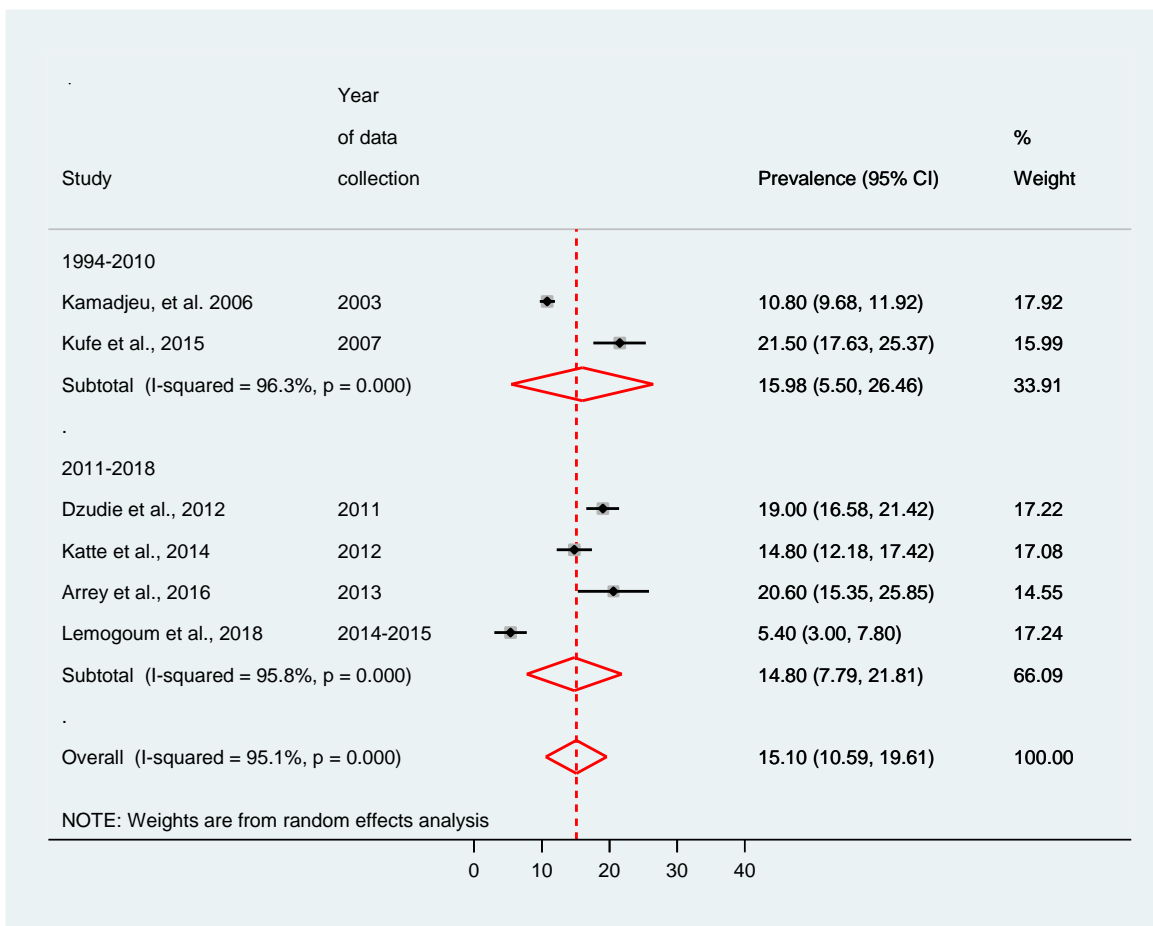

**Supplementary Figure 6. Forest plot of the prevalence of treatment of hypertension in Cameroon by period of data collection.**

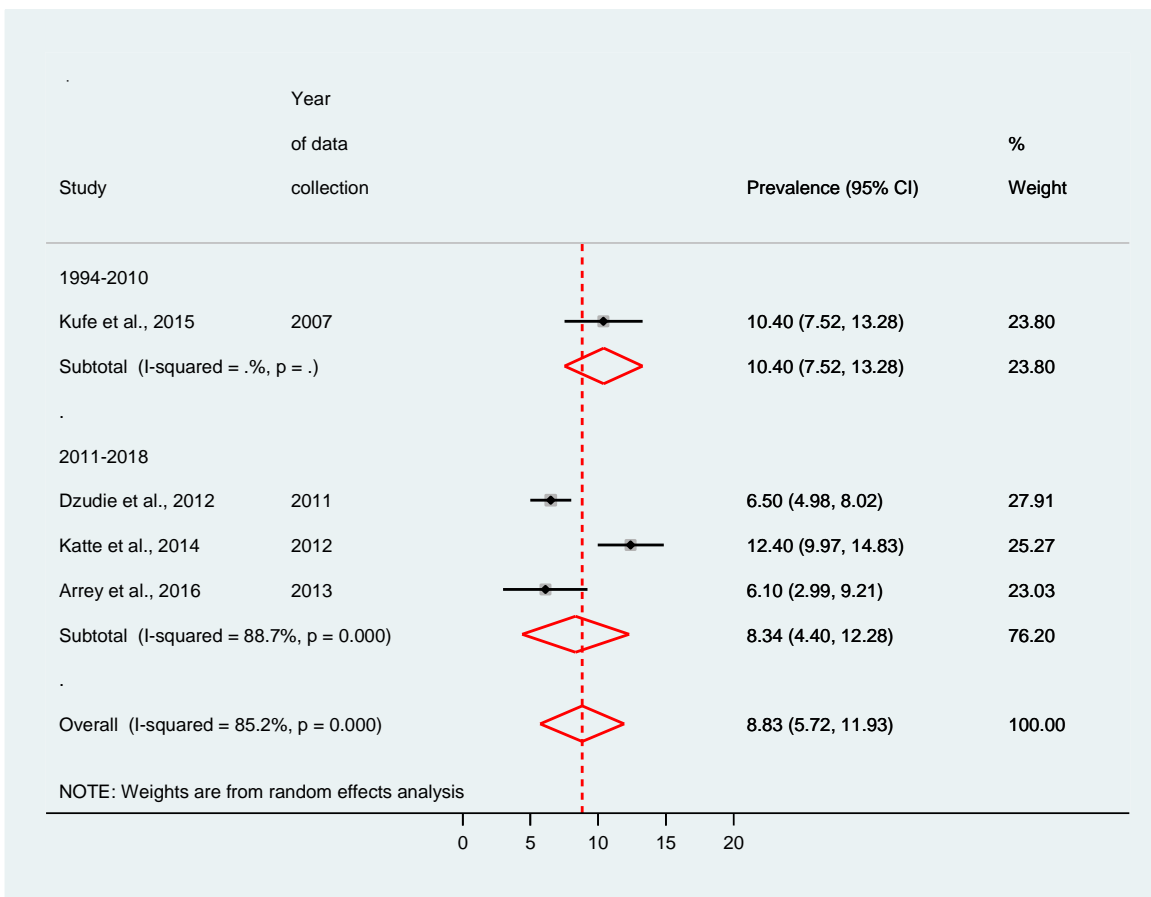

**Supplementary Figure 7. Forest plot of the prevalence of controlled hypertension in Cameroon by period of data collection.**

**a. Mean systolic blood pressure**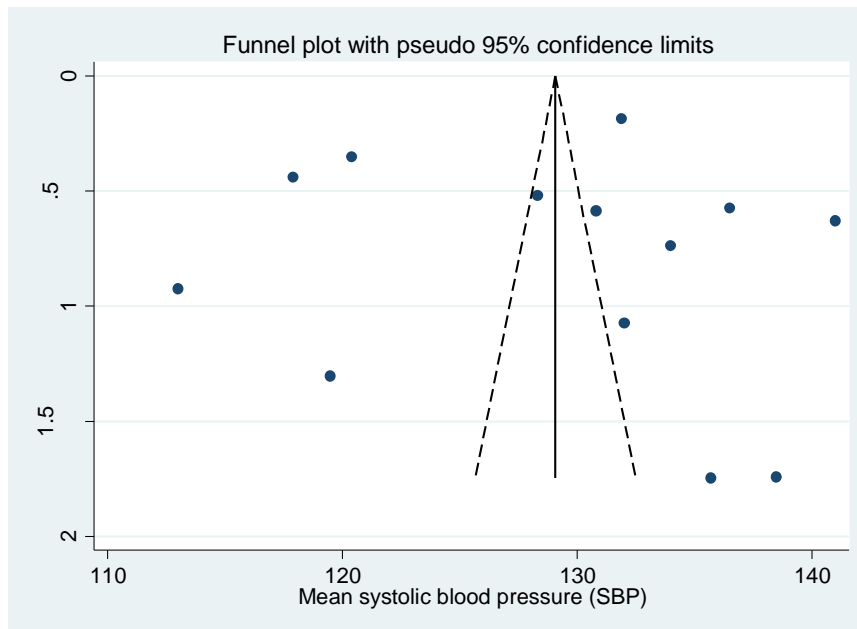**b. Mean diastolic blood pressure**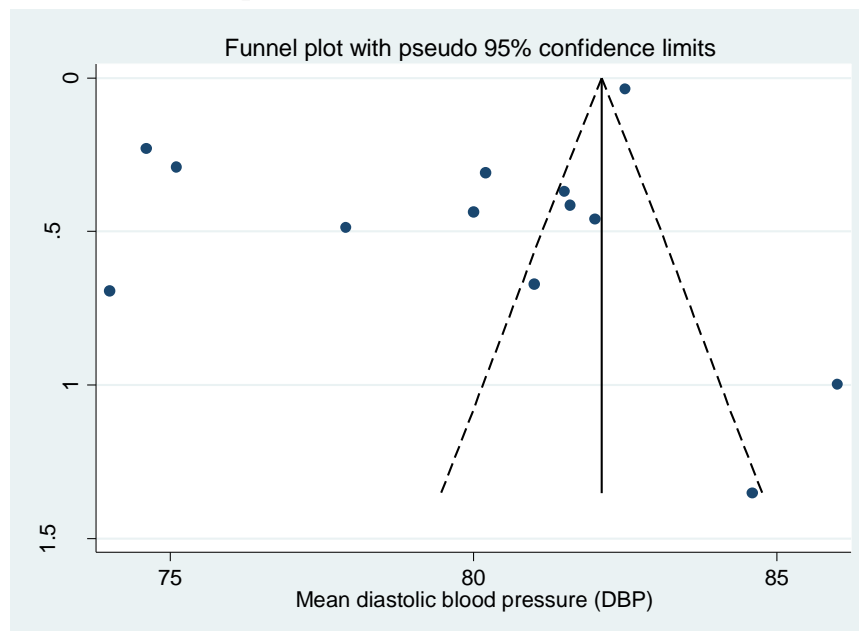

**Supplementary Figure 8. Funnel plots of the mean systolic and the mean diastolic blood pressure for data in Supplementary Figure 2.**

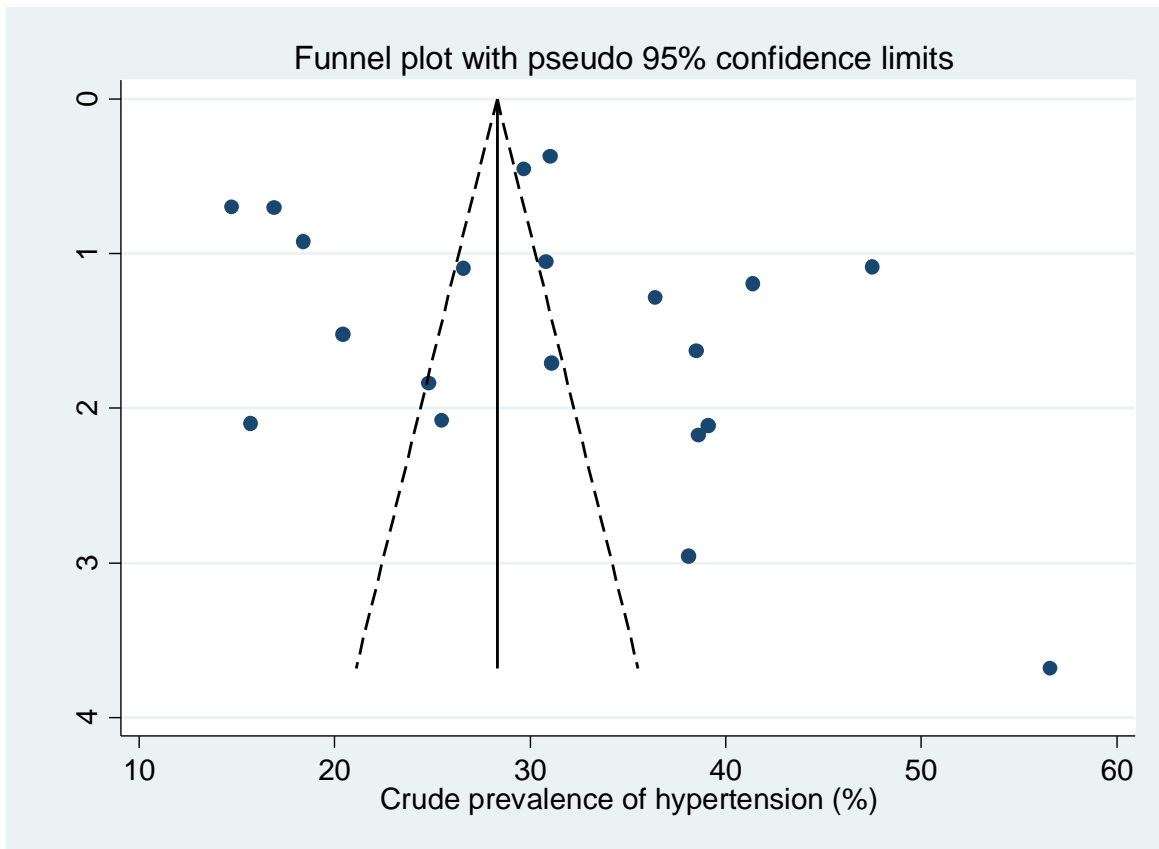

**Supplementary Figure 9. Funnel plot of the crude prevalence of hypertension for data in Supplementary Figure 3.**



**a. Crude prevalence of hypertension**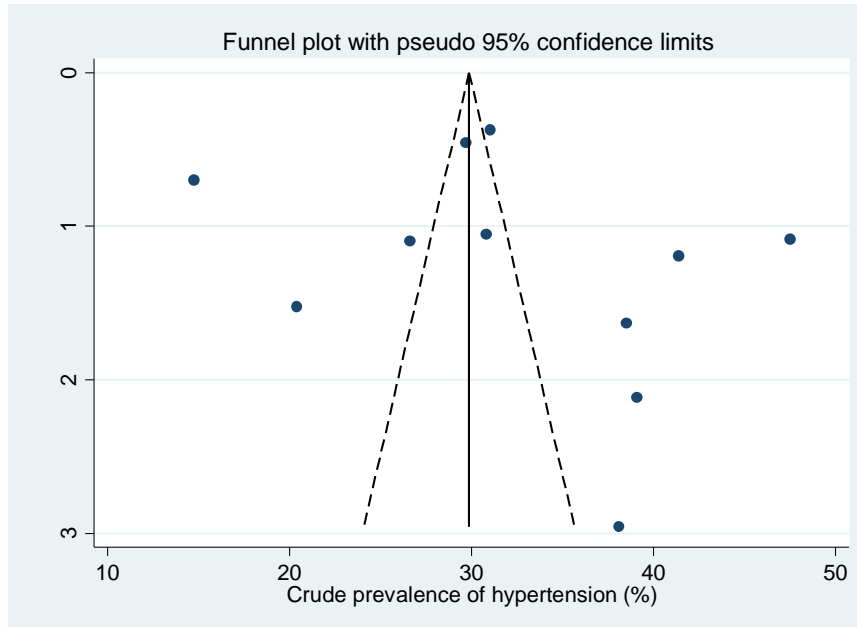**b. Age-standardized prevalence of hypertension**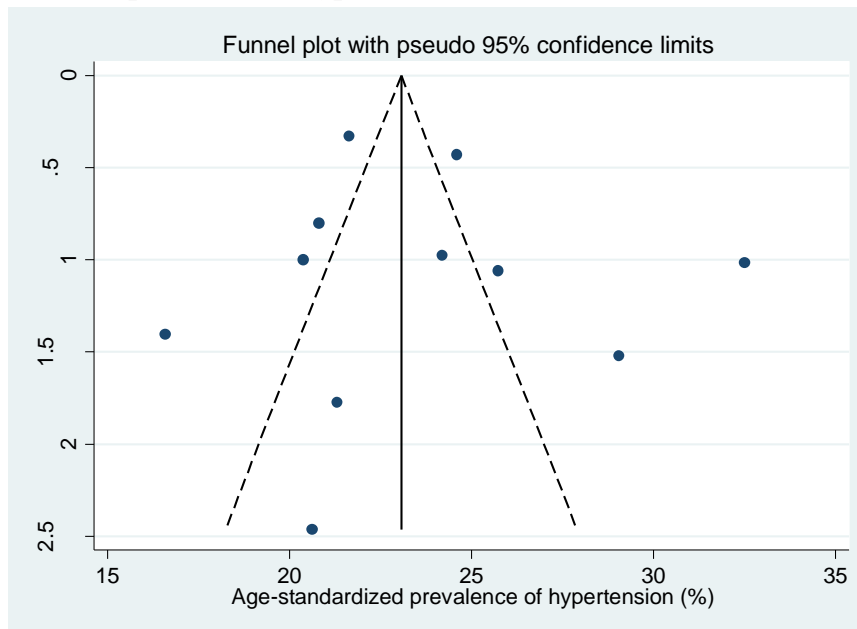

**Supplementary Figure 10. Funnel plots of the crude and age-standardized prevalence of hypertension for data in Supplementary Figure 4.**

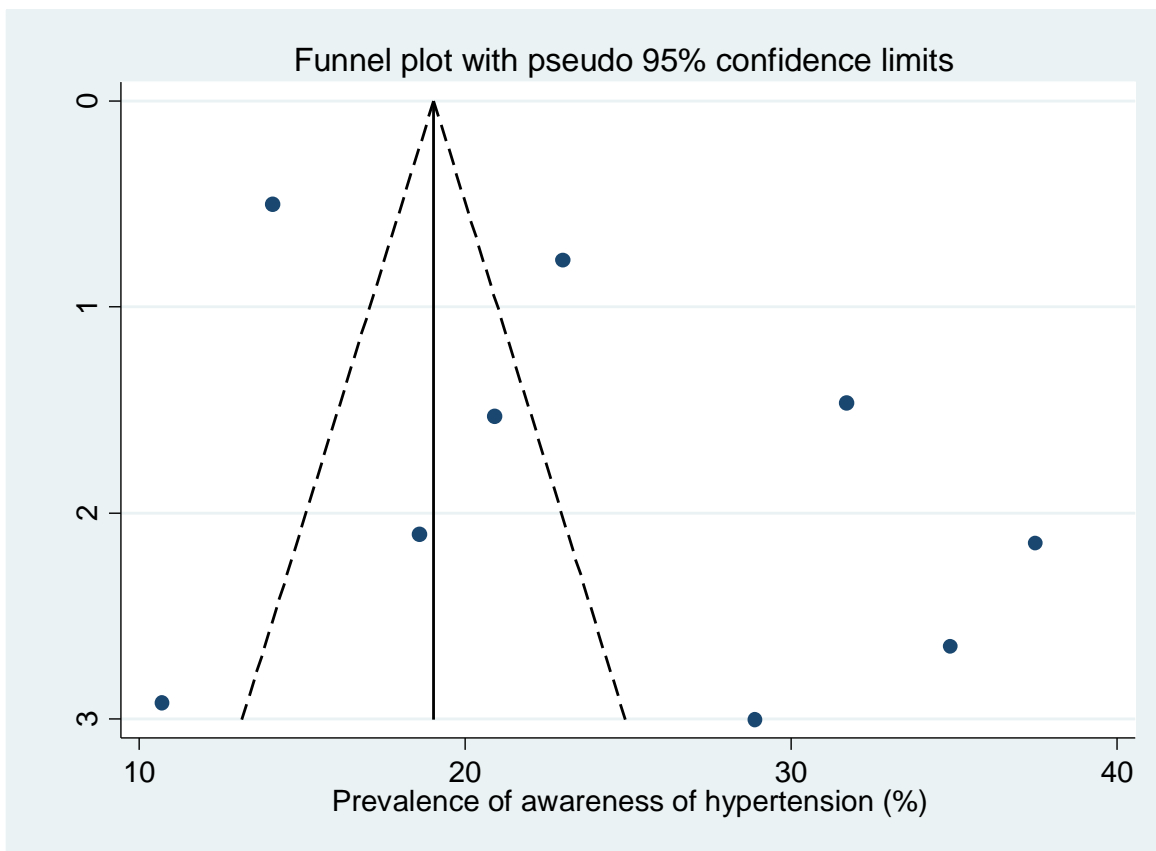

**Supplementary Figure 11. Funnel plot of the prevalence of awareness of hypertension for data in Supplementary Figure 5.**

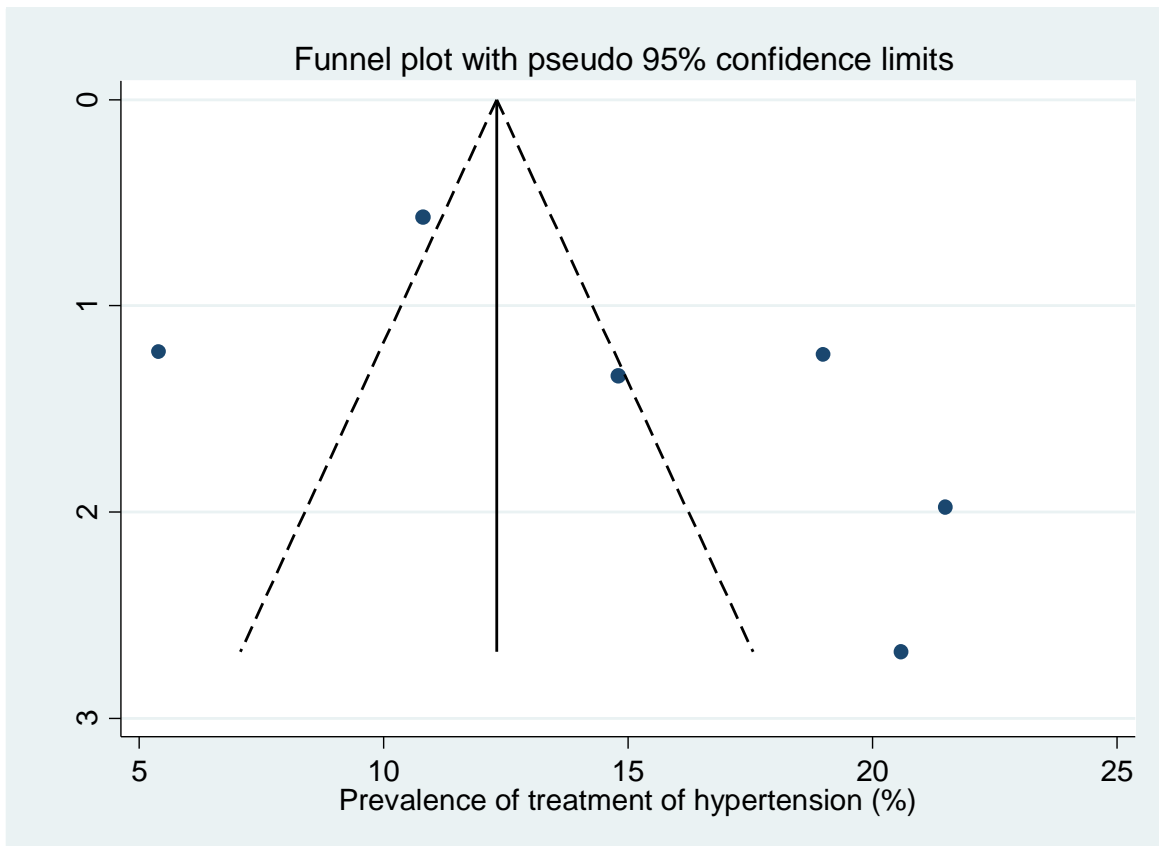

**Supplementary Figure 12. Funnel plot of the prevalence of treatment of hypertension for data in Supplementary Figure 6.**

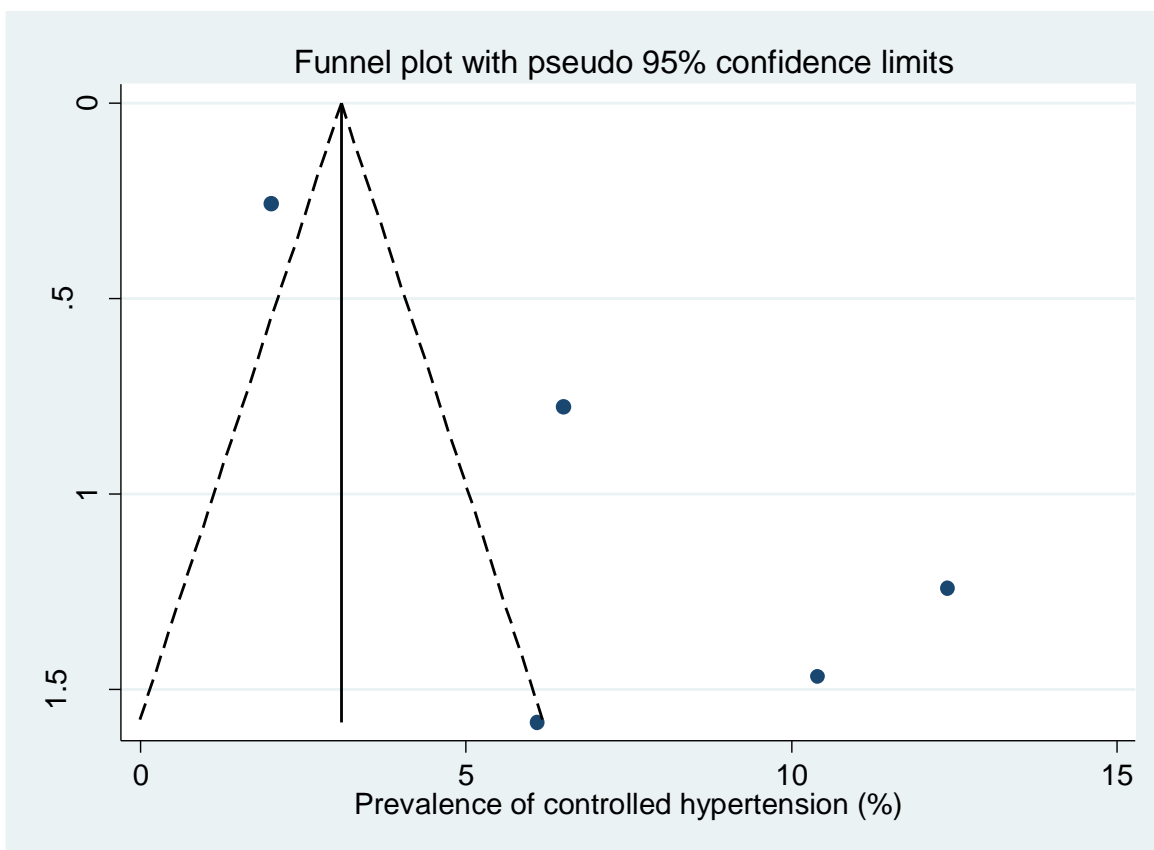

**Supplementary Figure 13. Funnel plot of the prevalence of controlled hypertension for data in Supplementary Figure 7.**
